# Supplementary material
Source: PubMed Central journal article supplement (PMC3993301)
Supplement: AEM.00061-14_zam999105319so1.pdf [file AEM.00061-14_zam999105319so1.pdf]

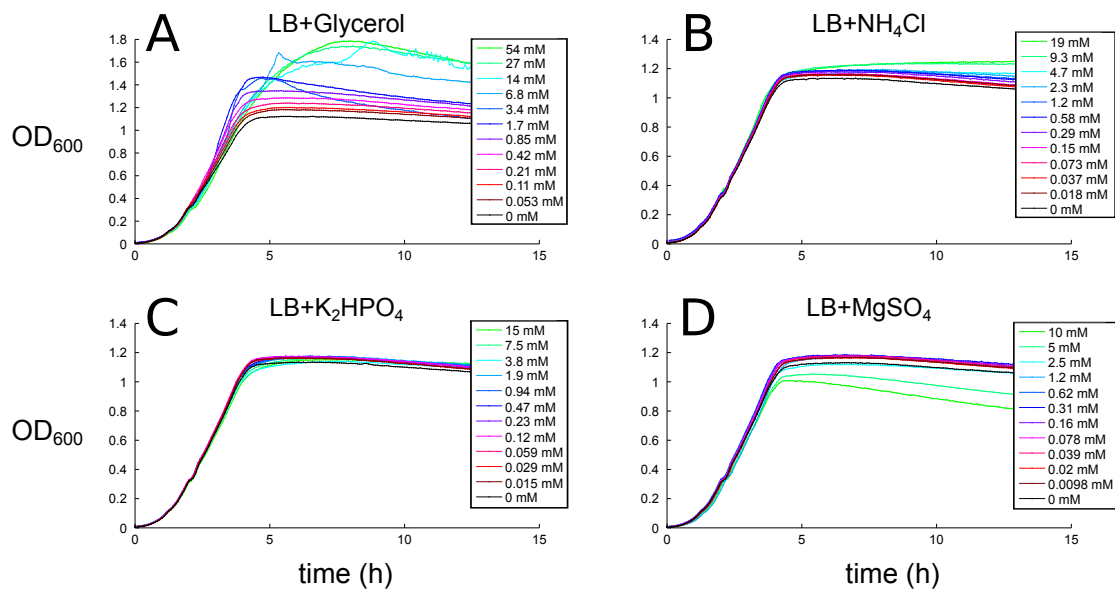

Figure S1. LB stationary phase is likely carbon-limited. Growth curves resulting from addition of glycerol (A), ammonium (B), phosphate (C), and magnesium sulfate (D) to 0.2x LB medium. Only addition of glycerol resulted in significant increase in final titer. Other carbon sources gave similar results (not shown).

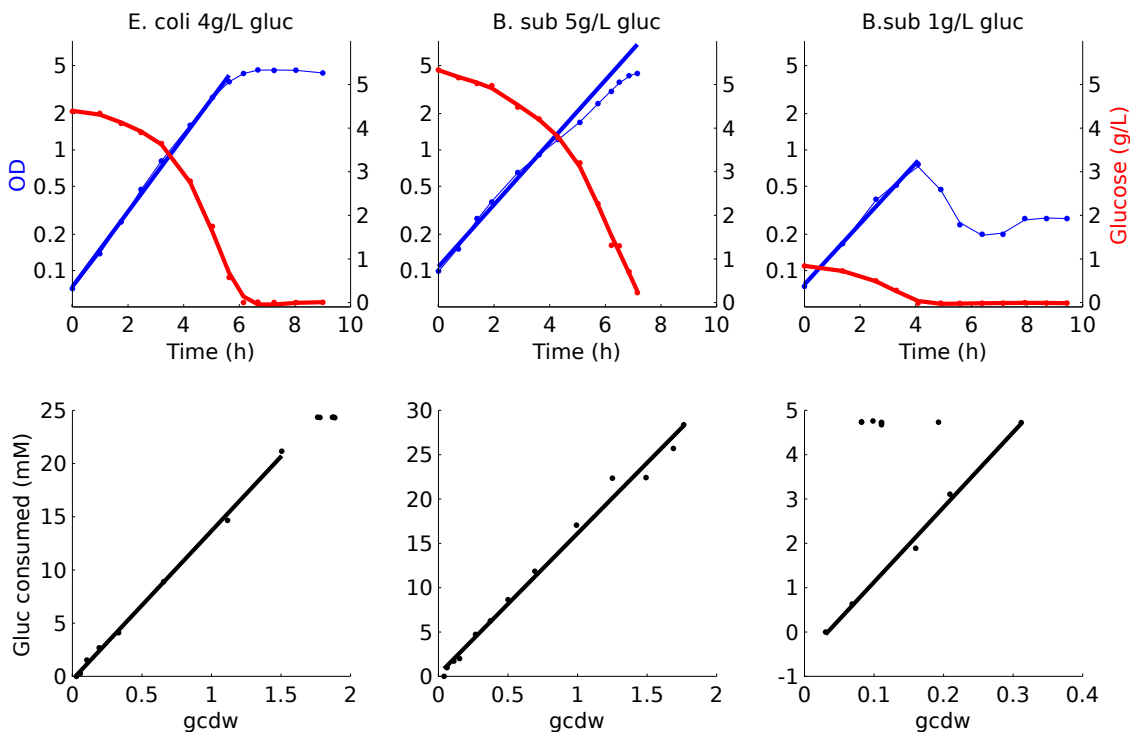

Figure S2. Growth and glucose uptake in M9 glucose (carbon limited) conditions. Top panels show OD (blue) and glucose (red). The growth rate is constant for most of the time course and drops to zero when glucose is exhausted. *Bacillus subtilis* also exhibits characteristic cell lysis upon glucose exhaustion, seen clearly in the 1g/L glucose condition. The bottom panels plot total glucose consumed against biomass produced (OD converted to grams cell dry weight (gcdw)). The linear fit shows a constant glucose uptake rate for the duration of the time course.
